# Supplementary material for: Plasmonic sensor with high figure of merit based on differential polarization spectra of elliptical nanohole array
Source: Royal Society of Chemistry journal article supplement (doi:10.1039/c7nr06067j), 2017-01-01
Supplement: c7nr06067j1.pdf [file c7nr06067j1.pdf]

**Supporting Information**

**Plasmonic Sensor with High Figure of Merit Based on Differential  
Polarization Spectra of Elliptical Nanohole Array**

Bin Ai,\* Pradip Basnet, Steven Larson, Whitney Ingram, and Yiping Zhao

Department of Physics and Astronomy, University of Georgia, Athens, GA 30602, USA

## Section SI. Evidence to Normalize the Transmission Spectra.

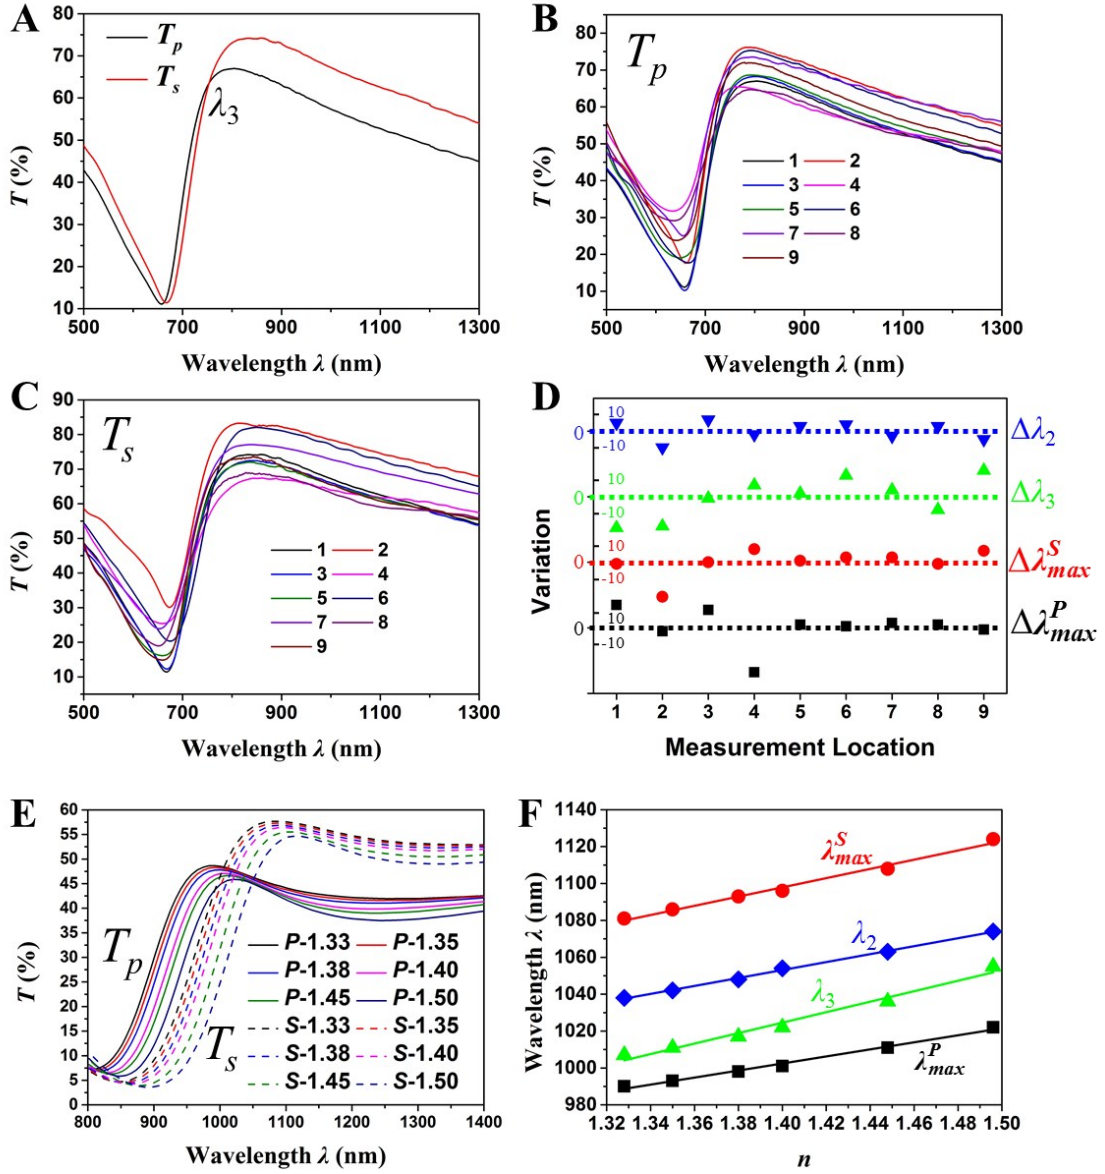

**Figure S1.** (A) Original  $T_p$  and  $T_s$  of the Ni based elevated elliptical nanohole array deposited at  $40^\circ$  (Sample EE $^{40^\circ}$ ). The cross-point wavelength from the original spectra is defined as  $\lambda_3$ . Original experimental (B)  $T_p$  and (C)  $T_s$  of the Ni based Sample EE $^{40^\circ}$  measured at different locations. (D) Variations of the  $\lambda_{max}^P$ ,  $\lambda_{max}^S$ ,  $\lambda_3$  and  $\lambda_2$  for repeated measurements in (B and C), whose standard deviations are 11 nm, 8 nm, 13 nm, and 5 nm, respectively. (E) Unnormalized  $T_p$  and  $T_s$  of the ENA in different  $n$  calculated by FDTD. (F) Linear fits of the

changes of  $\lambda_{max}^P$  ( $R^2 = 0.98950$ ),  $\lambda_{max}^S$  ( $R^2 = 0.98666$ ),  $\lambda_2$  ( $R^2 = 0.99732$ ), and  $\lambda_3$  ( $R^2 = 0.97387$ ) as a function of  $n$ .

The zero-crossing points (ZCPs,  $\lambda_2$ ) from the normalized  $T_p$  and  $T_s$  are used due to their better linear dependence on the changing refractive index ( $n$ ) as well as better stability/reliability in experimental measurements. Such a strategy has been validated by both experimental results and FDTD calculations, as shown in Figure S1.

The ZCP from the original  $T_p$  and  $T_s$  is defined as  $\lambda_3$  as shown in Figure S1A. Figures S1B and S1C show the nine repeated measurements of  $T_p$  and  $T_s$  for the Ni based Sample EE<sup>40°</sup> at different sample locations. The variations of the  $\lambda_{max}^P$ ,  $\lambda_{max}^S$ ,  $\lambda_3$ , and  $\lambda_2$  around their average values are shown in Figure S1D, whose standard deviations are 11 nm, 8 nm, 13 nm, and 5 nm, respectively. Obviously,  $\lambda_2$  has the smallest variation, showing the best accuracy in experimental measurements, while  $\lambda_3$  varies the most in the repeated measurements. Experimentally, the spectra will be affected by many factors, such as the uniformity of the sample, the defect in the sample, and the measurement conditions. The ZCPs will not only be determined by the peak and dip locations, but also their relative transmission. The large variations in  $\lambda_3$  shows that those experimental conditions have a significant effect, while the normalized spectra can significantly reduce these effects.

In addition, for an ideal structure,  $\lambda_3$  and  $\lambda_2$  follow the same trend as a function of  $n$ , which has been demonstrated by FDTD calculations, as shown in Figures S1E and S1F. Figure S1E shows the original  $T_p$  and  $T_s$  spectra in Figure 1 for different  $n$  calculated by FDTD. It can be seen that overall the  $T_p$  shifts to blue and has smaller transmission as compared with  $T_s$ . The

changes of  $\lambda_2$ ,  $\lambda_3$  as well as  $\lambda_{max}^P$ ,  $\lambda_{max}^S$  as a function of  $n$  are plotted in Figure S1F, and they all follow a linear relationship with very similar trends. The calculated slopes of the  $\lambda_{max}^P$ ,  $\lambda_{max}^S$ ,  $\lambda_2$ , and  $\lambda_3$  are 191, 250, 284 and 216 nm RIU<sup>-1</sup>, respectively. Thus, theoretically, both  $\lambda_2$  and  $\lambda_3$  can use in sensing.

## Section SII. Characterization of ENAs

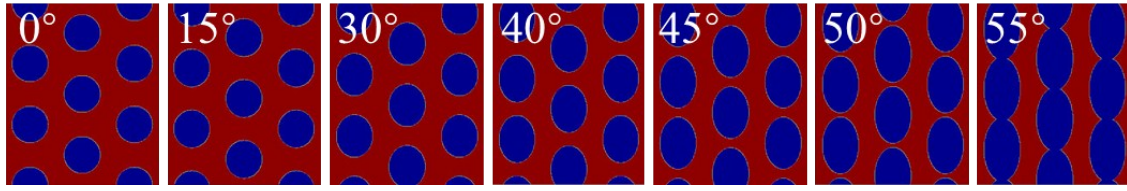

**Figure S2.** ENA morphologies at  $\theta = 0^\circ, 15^\circ, 30^\circ, 40^\circ, 45^\circ, 50^\circ$ , and  $55^\circ$ , respectively, where the deposited Ag films red and the underlying substrate blue, calculated by a home-made MatLab code.<sup>1</sup> The aspect ratio become larger with increasing  $\theta$ . When  $\theta = 55^\circ$ , zigzag Ag stripes will be formed on the substrates, rather than elliptical holes.

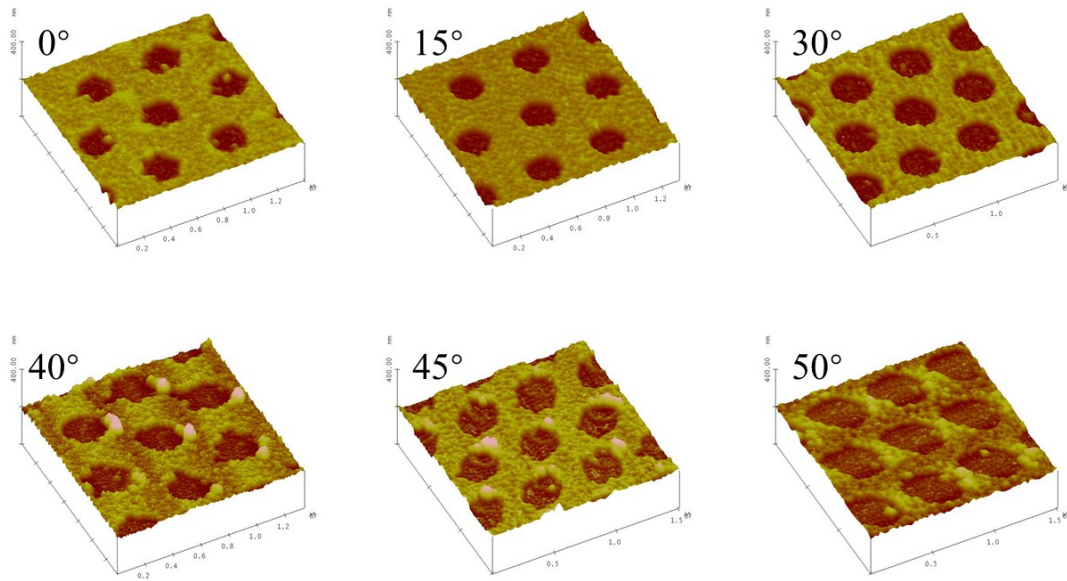

**Figure S3.** 3D AFM images of the ENAs fabricated at  $\theta = 0^\circ, 15^\circ, 30^\circ, 40^\circ, 45^\circ$  and  $50^\circ$ , respectively. As the  $\theta$  increases, the edge and surface roughness also increases.

### Section SIII. Sensing Performances of ENAs

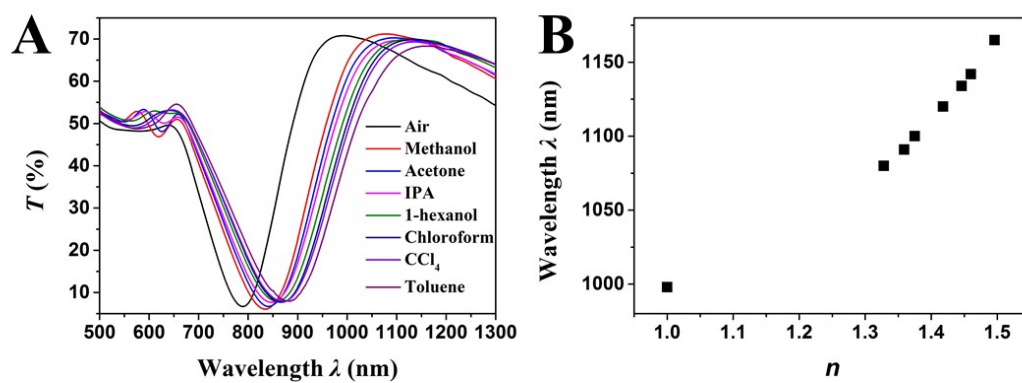

**Figure S4.** (A) Transmission spectra of the Sample  $E^0$  in different surrounding environments.

(B) Plot of the wavelength of the main transmission peak as a function of  $n$ .

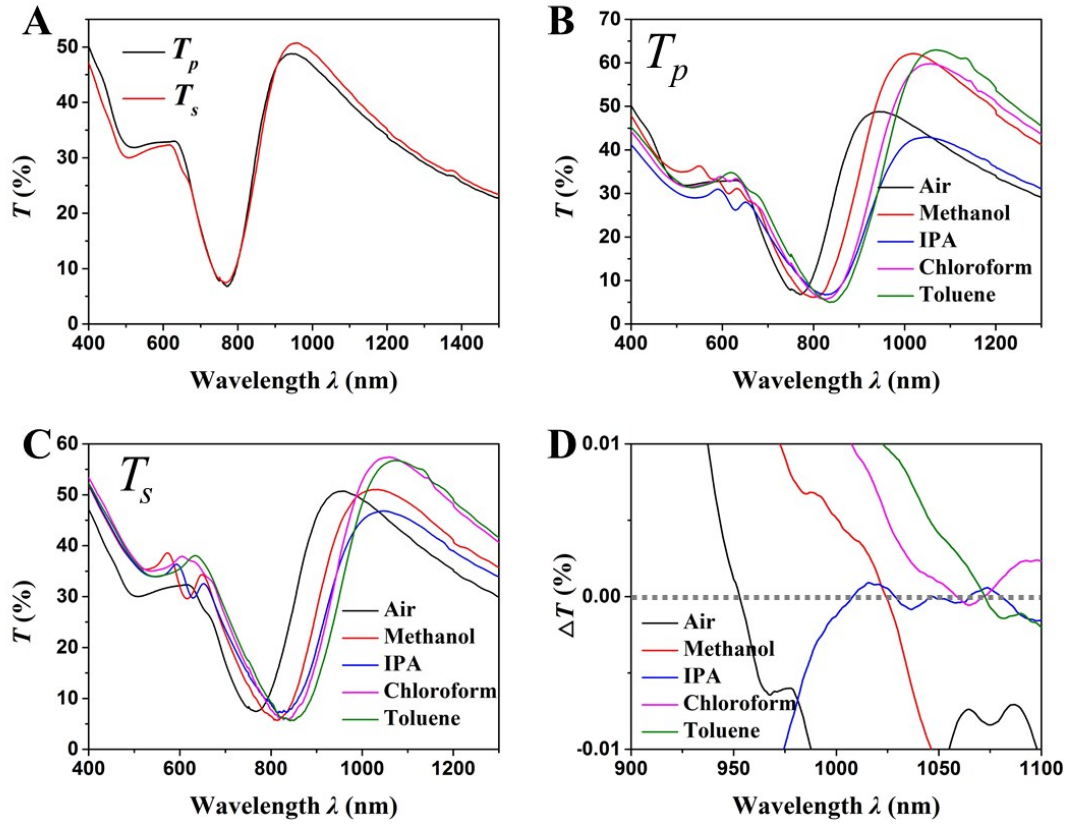

**Figure S5.** (A)  $T_p$  and  $T_s$  of the Sample E<sup>15°</sup> in air. (B)  $T_p$  and (C)  $T_s$  of the Sample E<sup>15°</sup> in different surrounding environments. (D) Spectra  $\Delta T$  of the Sample E<sup>15°</sup> in different surrounding environments. The grey dotted line indicates  $\Delta T = 0$ .

As shown in Figure S5A, the difference of  $T_p$  and  $T_s$  is very small for the Sample E<sup>15°</sup>. Although  $\lambda_{max}^P$  and  $\lambda_{max}^S$  show red-shifts with increasing  $n$  (Figures S5B and S5C),  $\lambda_2$  shifts unpredictably (Figure S5D). The small difference of  $T_p$  and  $T_s$  tends to generate more than one ZCP, as shown in Figure S5D, which means  $\lambda_2$  of the Sample E<sup>15°</sup> cannot be obtained consistently.

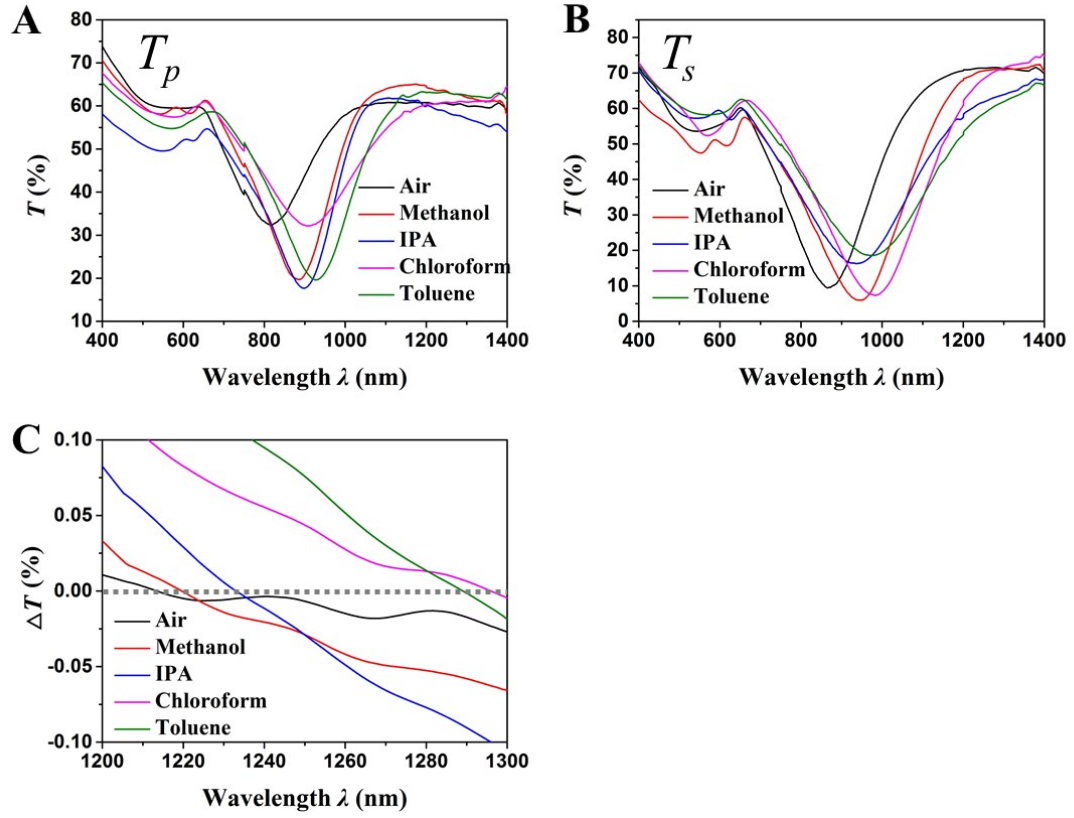

**Figure S6.** (A)  $T_p$  and (B)  $T_s$  of the Sample  $E^{40^\circ}$  in different surrounding environments. (C) Spectra  $\Delta T$  of the Sample  $E^{40^\circ}$  in different surrounding environments. The grey dotted line indicates  $\Delta T = 0$ .

Figures S6A and S6B show  $T_p$  and  $T_s$  of the Sample  $E^{40^\circ}$  in different surrounding environments, respectively. Qualitatively, they both show red-shifts with increasing  $n$ . However, the broad peaks not only cause trouble for normalization, but also makes it difficult to identify  $\lambda_2$ . The resulted  $\lambda_2$  shown in Figure S6C does not shift consistently with  $n$ .



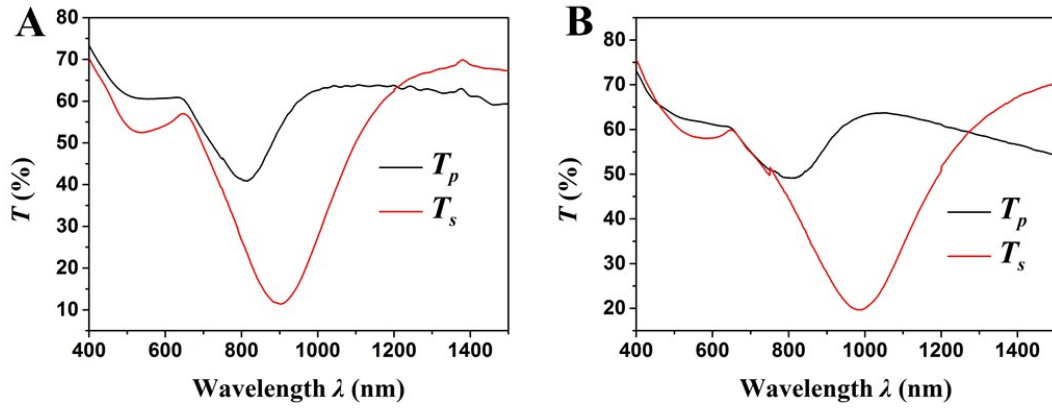

**Figure S7.**  $T_p$  and  $T_s$  of the Samples (A)  $E^{45^\circ}$  and (B)  $E^{50^\circ}$  in air.

As shown in Figure S7, the peaks of the Samples  $E^{45^\circ}$  and  $E^{50^\circ}$  are broader than those of the Sample  $E^{40^\circ}$ . Due to the same reason discussed in Figure S6, they also cannot be used with this method.

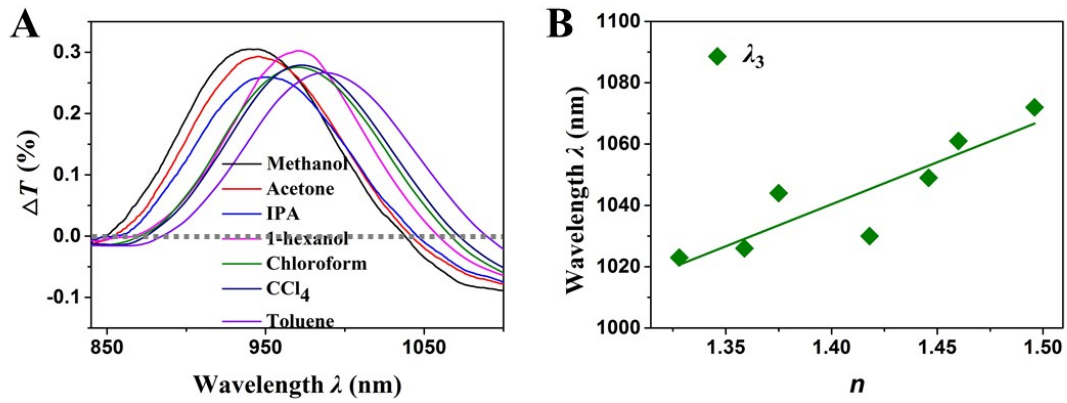

**Figure S8.** (A) Spectra  $\Delta T$  of the Sample  $E^{30^\circ}$  in different liquids. (B) Linear fit of the peak shift of  $\lambda_3$  as a function of  $n$ . The fitting linearity of  $\lambda_3$  ( $R^2 = 0.75476$ ) is much worse than that of  $\lambda_2$  ( $R^2 = 0.96296$ ). This is consistent with the discussion in Section SI.

## Section SIV. Influence of Instrument Noise

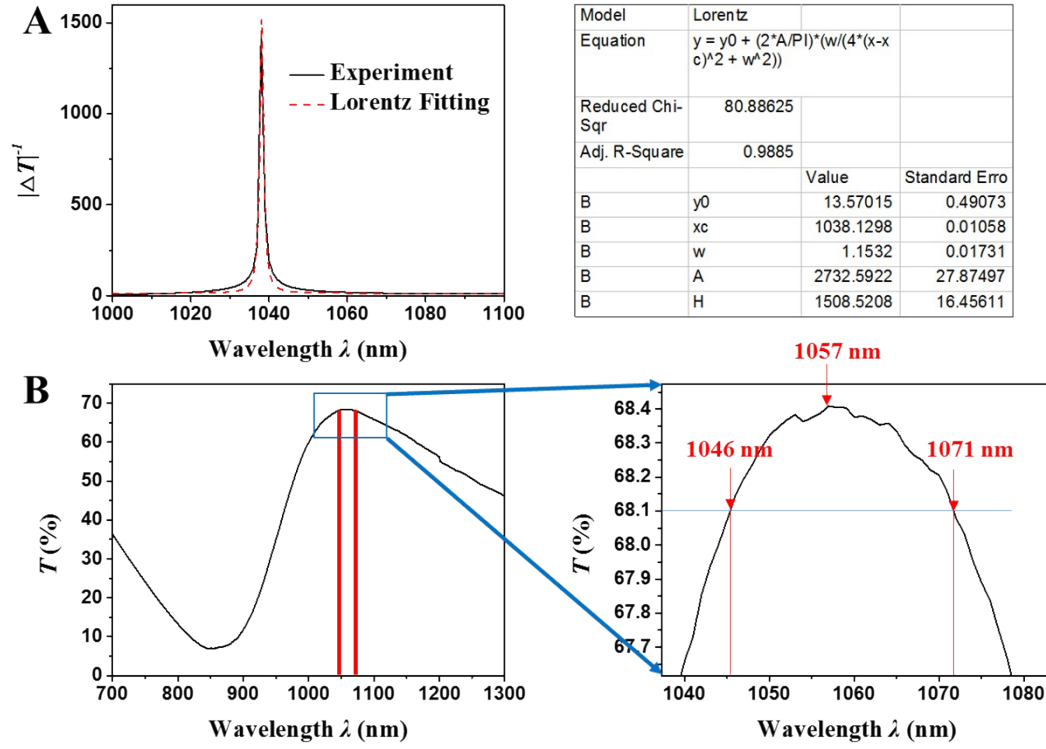

**Figure S9.** (A) Experimental  $|\Delta T|^{-1}$  and the Lorentz fitting of  $\lambda_2$  of the Sample  $E^{30^\circ}$  in methanol. The factor  $xc$  is the peak wavelength, whose standard error is 0.01058. (B)  $T_P$  of the Sample  $E^{30^\circ}$  in methanol. The red lines indicate the error range. The area in the blue rectangle is shown in the right figure. The peak wavelength is  $1059 \pm 12$  nm.

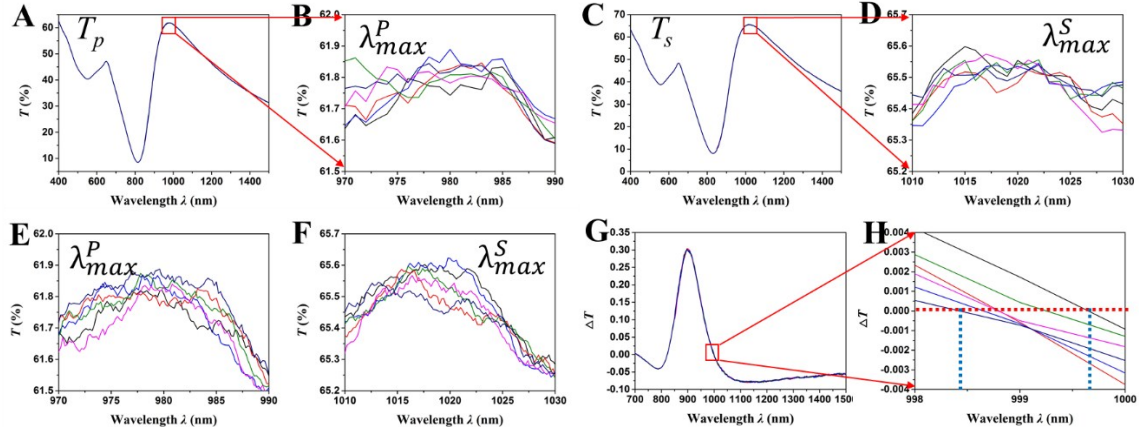

**Figure S10.** (A) Spectra  $T_p$  of the Sample  $E^{30^\circ}$  measured at the same position. (B)

Amplification of the area indicated by the red rectangle in (A). (C) Spectra  $T_s$  of the Sample  $E^{30^\circ}$  measured at the same position. (D) Amplification of the area indicated by the red rectangle in (C). The spectra in (A-D) were measured with 1-nm instrument resolution. Spectra (E)  $T_p$  and (F)  $T_s$  measured at the same position with 0.2-nm data pitch. The spectra are amplified at the peak  $\lambda_{max}^P$  and  $\lambda_{max}^S$ . (G) Spectra  $\Delta T$  of the Sample  $E^{30^\circ}$  achieved from  $T_p$  and  $T_s$  measured with 1-nm instrument resolution. (H) Amplification of the area indicated by the red rectangle in (G). The dotted lines indicate the ZCPs.

As shown in Figure S10A-D, the spectra were measured repeatedly for six times at the same location of the same sample. The instrument resolution for the measurements in Figure S10A-D is 1 nm. There is a deviation of about  $\pm 4$  nm for the peak wavelength  $\lambda_{max}^P$  and  $\lambda_{max}^S$  due to the instrument noise. It should keep in mind that the deviation is achieved by limited measuring times (six times). The values of the error calculated in Figure S9 are based on the manual of the instrument. When the spectra were measured using the resolution of 0.2 nm in Figures S10E and S10F, the deviation is also at about  $\pm 4$  nm (Figures S10E and S10F). This demonstrates that 1-nm resolution would not lead to higher influence of instrument noise. For

spectra  $\Delta T$  in Figures S10G and S10H, the deviation of the ZCP is  $\pm 0.7$  nm. It is found that using differential spectra is easy to determine ZCPs and can lower the influence of instrument noise in determining the peak positions. However, using the peak fitting method for a broad peak, it is hard to determine the peak location with intensity fluctuation. This is due to the fact that the slope of the difference spectrum at the ZCP is large, so the noise can hardly affect the ZCP determination; while for the peak fitting, the slope near the peak location is nearly zero, so small intensity variation by the noise could significantly vary the determination of peak position.

### Section SV. Local $E$ -fields of ENAs Calculated by FDTD

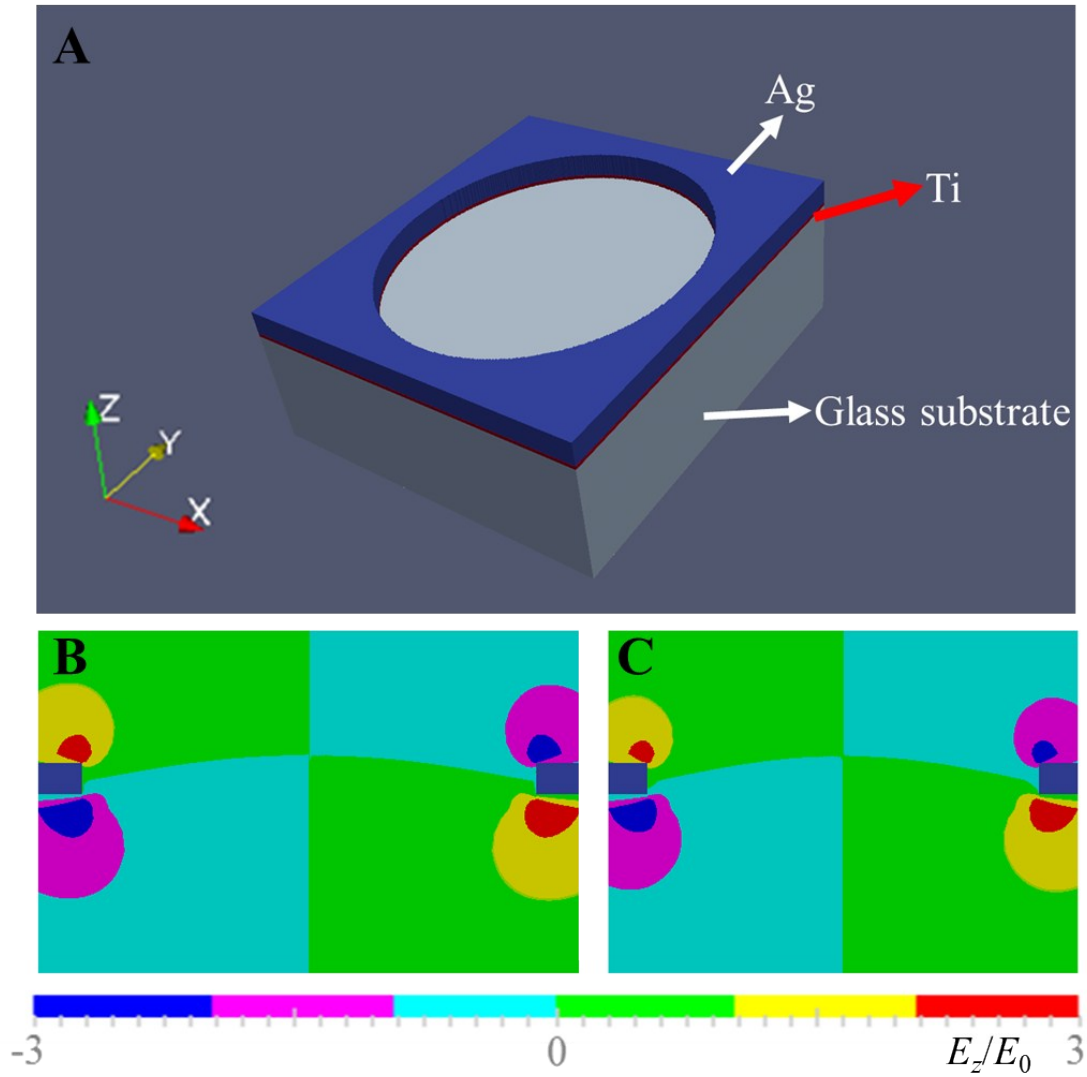

**Figure S11.** (A) The structure model of the Sample E<sup>30°</sup> used in the FDTD calculation. The unit cell used in calculation is a rectangle, consisting of one hole in the center and four quarter-holes at the four corners. The normalized  $z$ -component  $E$ -field ( $E_z$ ) at (B) the  $y$ - $z$  plane for  $P$ -polarization light and (C) at the  $x$ - $z$  plane for  $S$ -polarization light. They were calculated at the peak wavelength of  $\lambda_{max}^P = 925$  nm for (B) and  $\lambda_{max}^S = 1011$  nm for (C) as illustrated in Figure 1. The details of FDTD calculations can be found in the experimental section.

## Section SVI. Characterization of EENAs

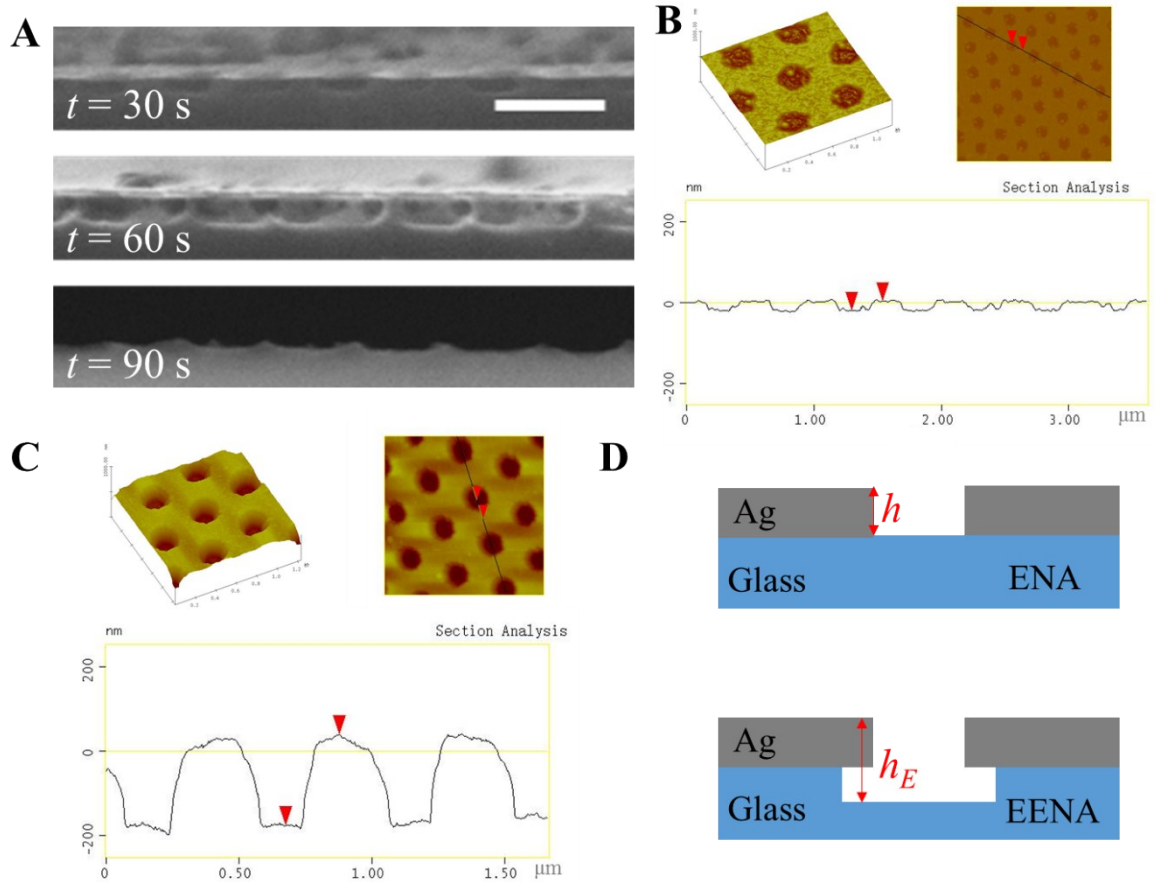

**Figure S12.** (A) Cross-sectional SEM images of the nanohole array at  $\theta = 0^\circ$  etched in 1 % HF for  $t = 30$  s, 60 s, and 90 s, respectively. The scale bar represents 500 nm. The film detaches from the substrate when  $t = 90$  s. AFM profiles of (B) the as-deposited nanohole array and (C) the elevated nanohole array etched for  $t = 60$  s at  $\theta = 0^\circ$ . (D) Schematics of the definition of the height  $h$  and  $h_E$  for (B) and for (C), which are  $\sim 23$  and  $\sim 200$  nm, respectively.

## Section SVII. Sensing Performances of EENAs

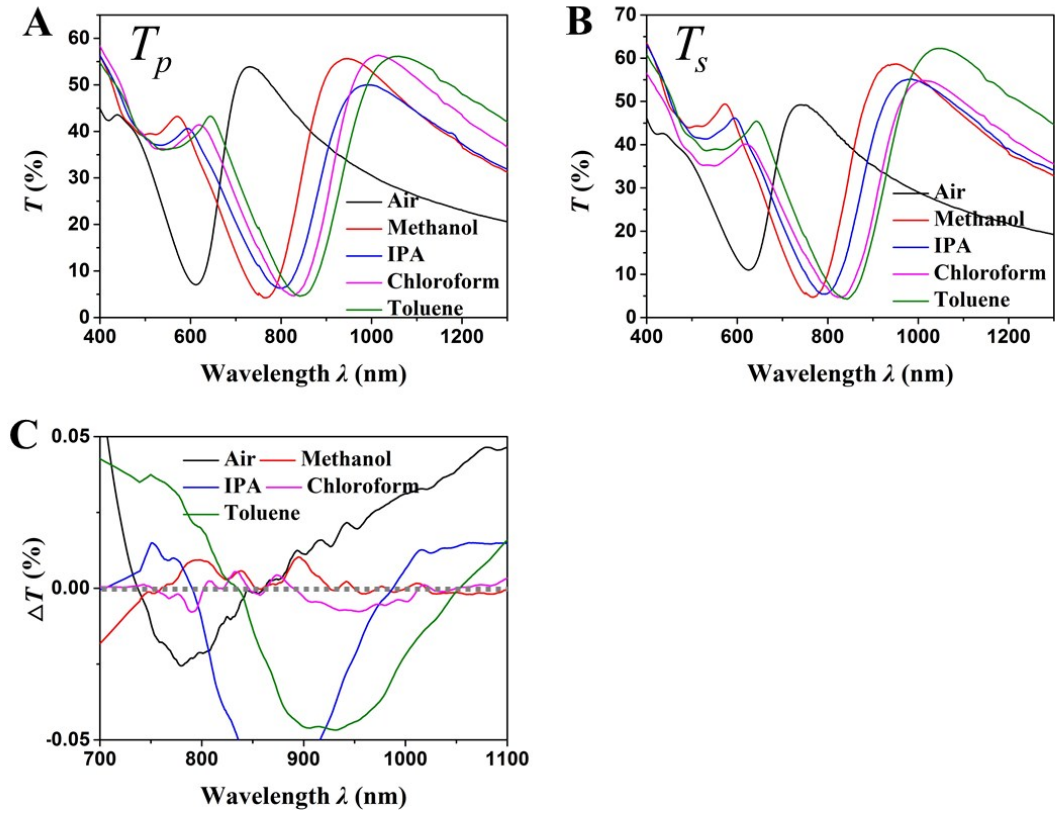

**Figure S13.** (A)  $T_p$  and (B)  $T_s$  of the Sample  $EE^{15^\circ}$  in different surrounding environments. (C) The corresponding spectra  $\Delta T$  of the Sample  $EE^{15^\circ}$ . The grey dotted line indicates  $\Delta T = 0$ .  $\lambda_2$  shifts randomly with  $n$  due to the small difference in  $T_p$  and  $T_s$ .

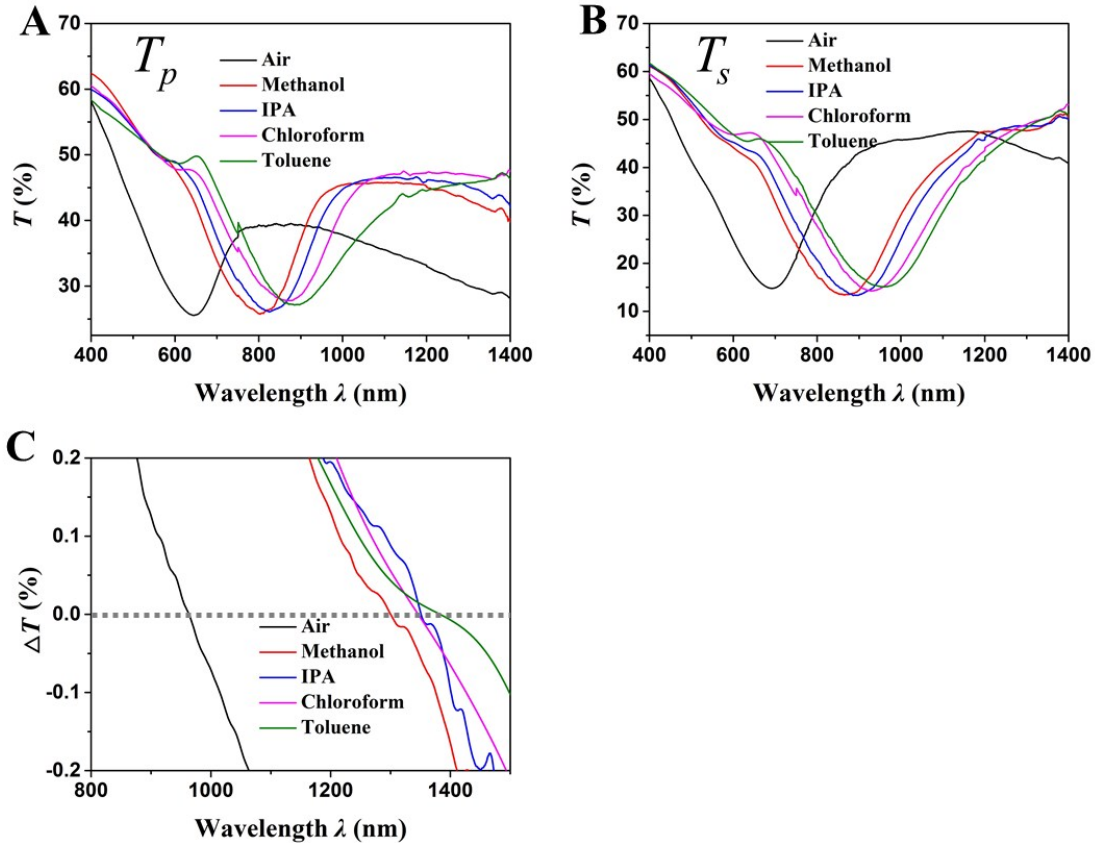

**Figure S14.** (A)  $T_p$  and (B)  $T_s$  of the Sample EE<sup>45°</sup> in different surrounding environments. The peaks are very broad (FWHM > 500 nm). (C) The corresponding spectra  $\Delta T$  of the Sample EE<sup>45°</sup>. The grey dotted line indicates  $\Delta T = 0$ .  $\lambda_2$  shifts unpredictably with  $n$  due to the broad peaks.



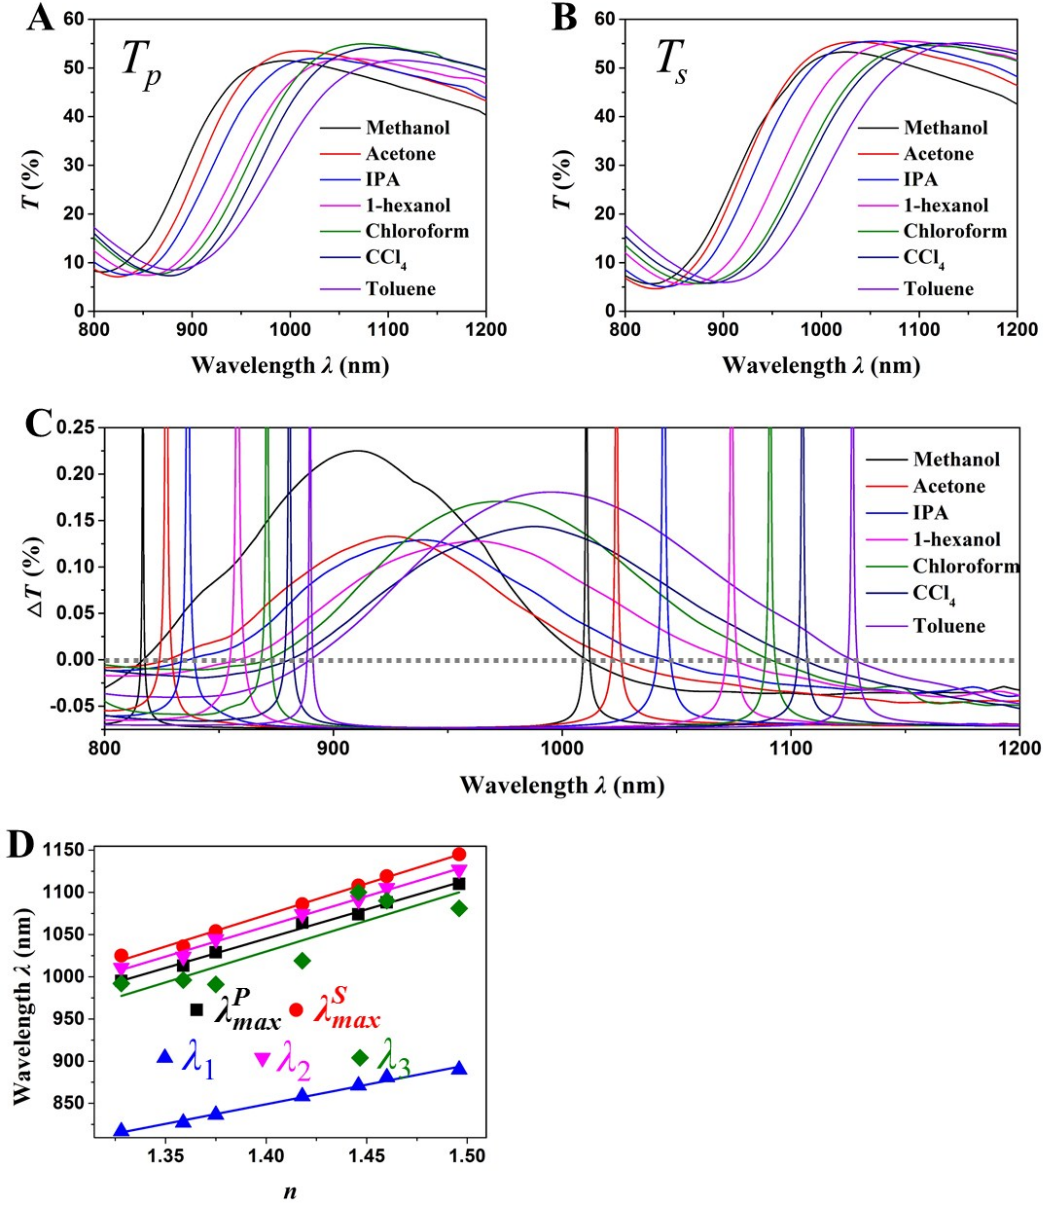

**Figure S15.** (A)  $T_p$  and (B)  $T_s$  of the Sample EE<sup>30°</sup> in different surrounding environments. (C) The corresponding spectra of  $\Delta T$  and  $|\Delta T|^{-1}$  at  $\lambda_1$  and  $\lambda_2$ . (D) Linear fits of the peak shift of  $\lambda_{max}^P$ ,  $\lambda_{max}^S$ ,  $\lambda_1$ ,  $\lambda_2$ , and  $\lambda_3$  as a function of  $n$ . The fitting linearity of  $\lambda_3$  ( $R^2 = 0.74143$ ) is much worse than that of  $\lambda_2$  ( $R^2 = 0.99263$ ). This is consistent with the discussion in Section SI.

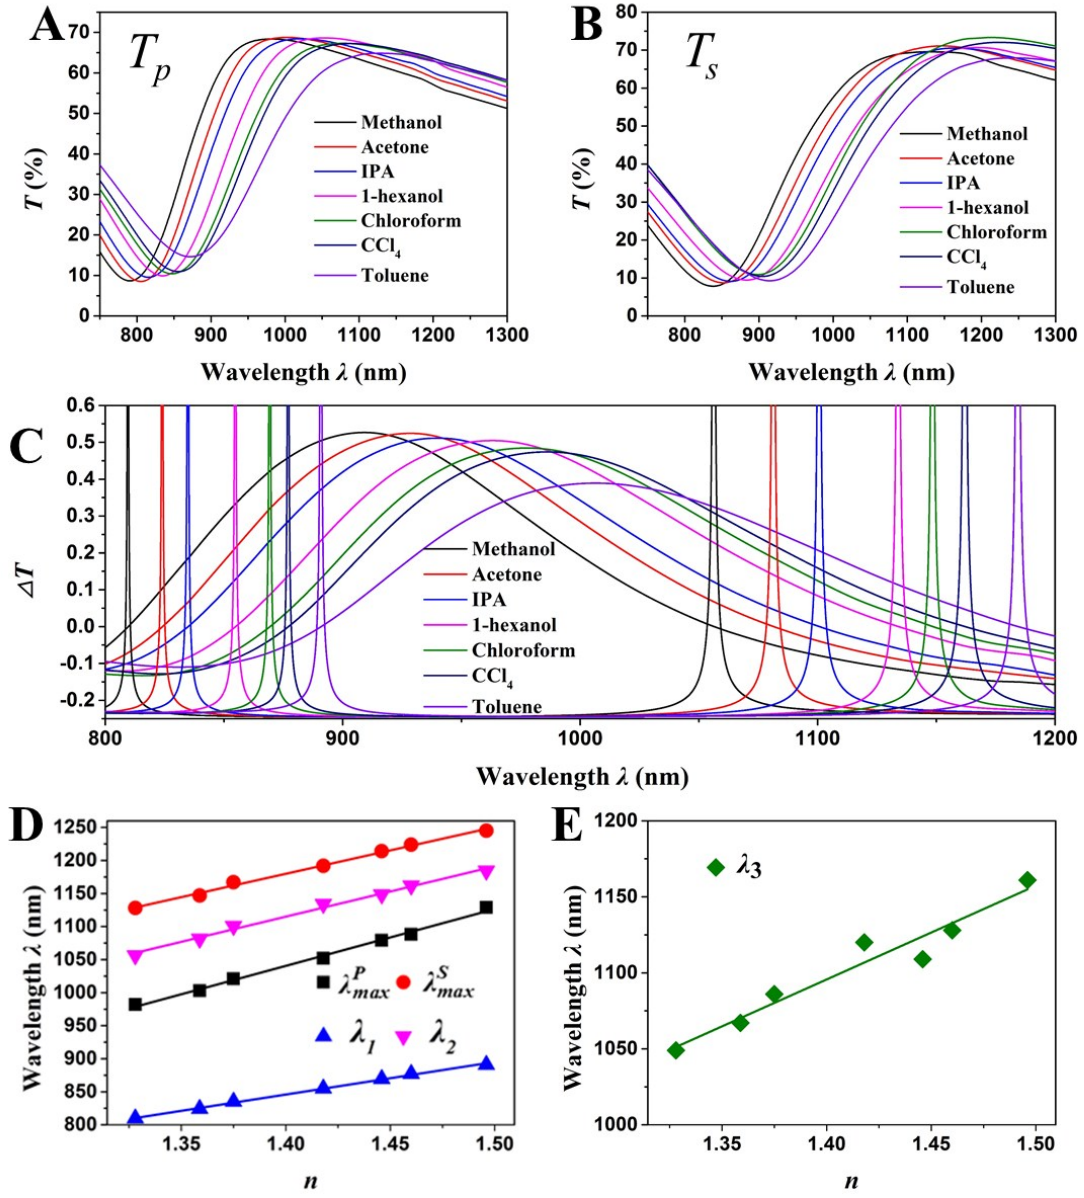

**Figure S16.** (A)  $T_p$  and (B)  $T_s$  of the Sample EE<sup>40°</sup> in different surrounding environments. (C) Spectra of  $\Delta T$  and  $|\Delta T|^{-1}$  at  $\lambda_1$ , and  $\lambda_2$  in different liquids. (D) Linear fits the peak shift of  $\lambda_{max}^P$ ,  $\lambda_{max}^S$ ,  $\lambda_1$  and  $\lambda_2$  as a function of  $n$ . (E) Linear fit of the peak shift of  $\lambda_3$  as a function of  $n$ . The fitting linearity of  $\lambda_3$  ( $R^2 = 0.93091$ ) is much worse than that of  $\lambda_2$  ( $R^2 = 0.99171$ ). This is consistent with the discussion in Section SI.

## Section SVIII. Sensing Performances of Ni Based EENAs

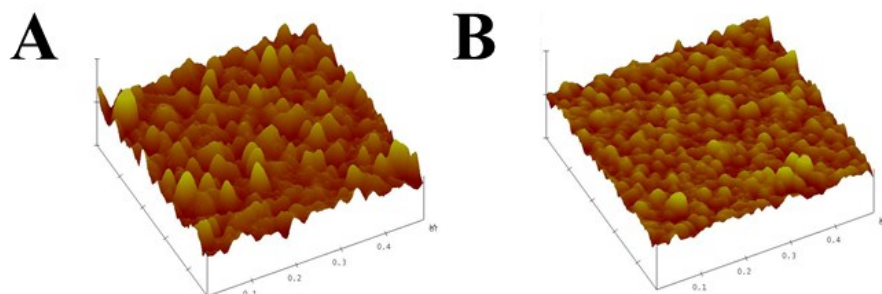

**Figure S17.** 3D AFM images of the Ag surface on a (A) Ti and (B) Ni adhesive layer.

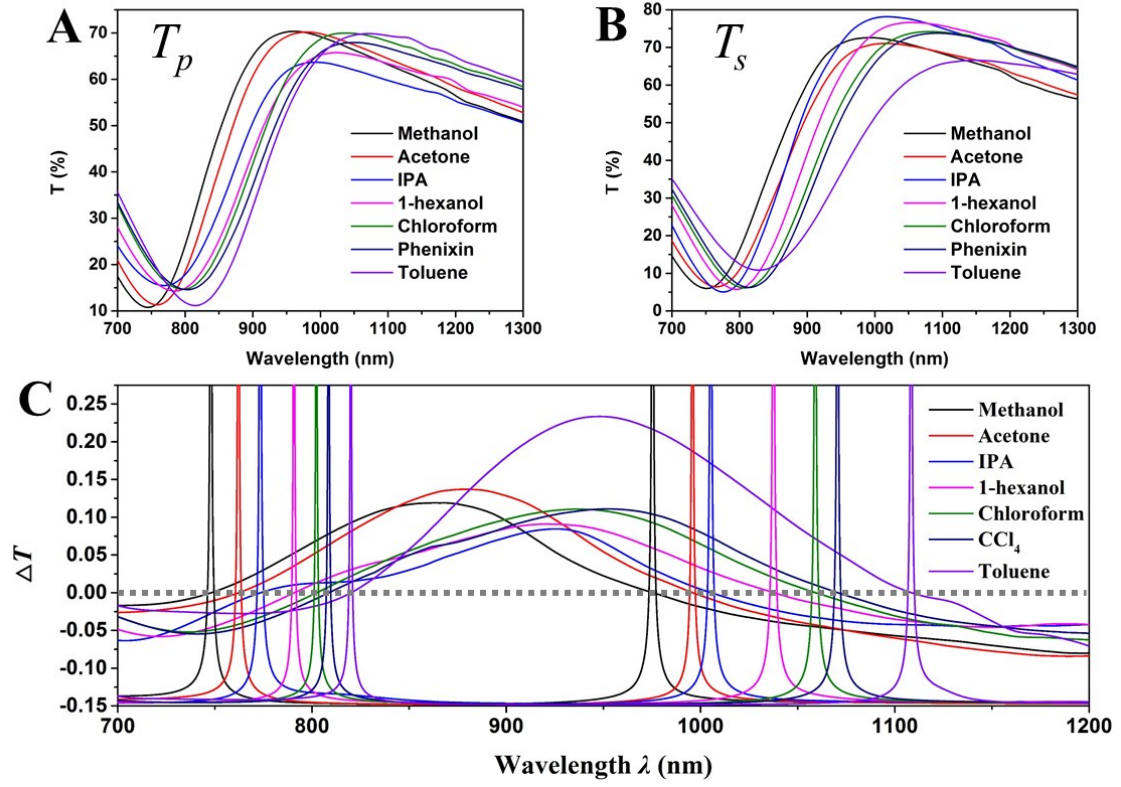

**Figure S18.** (A)  $T_p$  and (B)  $T_s$  of the Ni based Sample  $\text{EE}^{40^\circ}$  in different surrounding environments. (C) The corresponding spectra of  $\Delta T$  and  $|\Delta T|^{-1}$  at  $\lambda_1$  and  $\lambda_2$ .

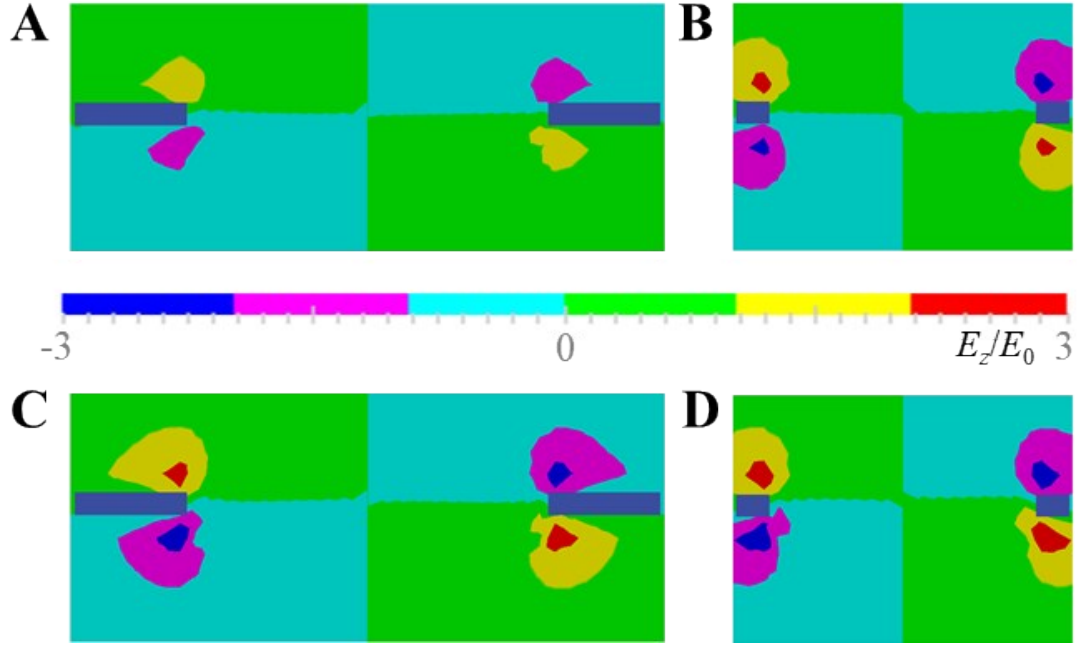

**Figure S19.** The calculated distribution of z-component  $E$ -field ( $E_z$ ) of the Sample EE<sup>40°</sup> on a Ti adhesive layer for (A)  $P$ - ( $y$ - $z$  plane) and (B)  $S$ -polarization ( $x$ - $z$  plane). The calculated distribution of z-component  $E$ -field ( $E_z$ ) of the Sample EE<sup>40°</sup> on a Ni adhesive layer for (C)  $P$ - ( $y$ - $z$  plane) and (D)  $S$ -polarization ( $x$ - $z$  plane). Distributions were calculated at the peak wavelength of  $\lambda_{max}^P = 788$  nm for (A) and (C) and  $\lambda_{max}^S = 944$  nm for (B) and (D).

## Section SIX. Absorption of MBA.

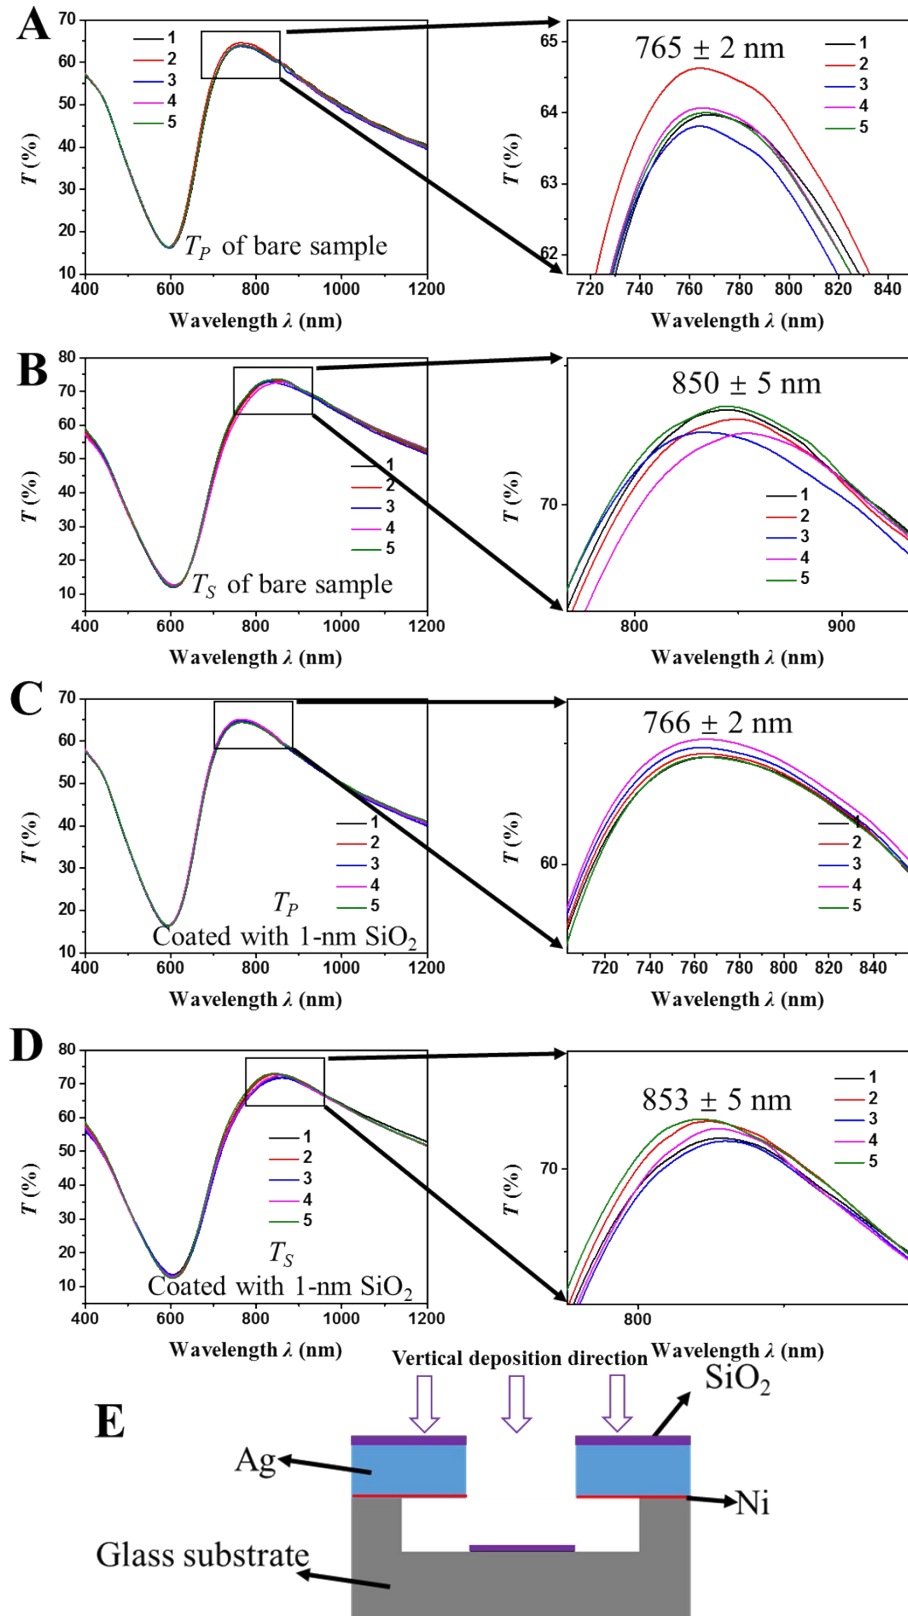

**Figure S20.** (A)  $T_P$  and (B)  $T_S$  of the bare  $EE_{Ni}^{40^\circ}$  sample. (C)  $T_P$  and (D)  $T_S$  of the  $EE_{Ni}^{40^\circ}$  sample

coated with 1-nm SiO<sub>2</sub> dielectric layer. The test location was marked. The measurements were repeated for five times, which were indicated by the legend in each image. The right figures are the magnification of the peak shift. (E) A schematic showing the structure of the sample coated with 1-nm SiO<sub>2</sub> layer in the experiment. SiO<sub>2</sub> was vertically deposited onto the sample

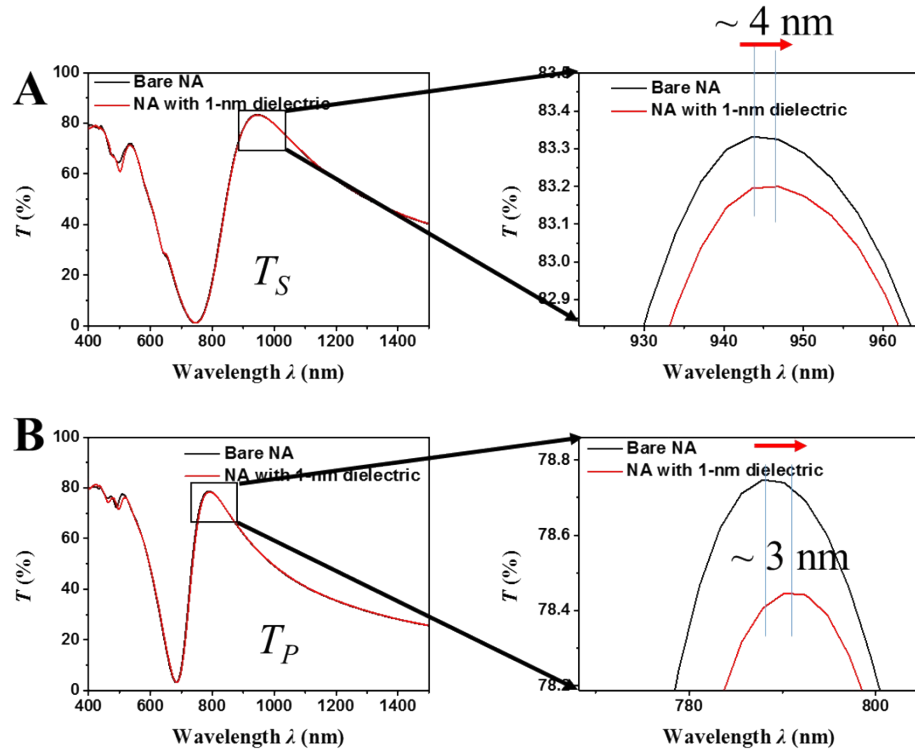

**Figure S21.** (A)  $T_S$  and (B)  $T_P$  of the bare  $\text{EE}_{\text{Ni}}^{40^\circ}$  sample and the sample coated with a 1-nm  $\text{SiO}_2$  layer. The right figures are the magnification of the peak shift.



## Section SX. Detection of RNA Hybridization

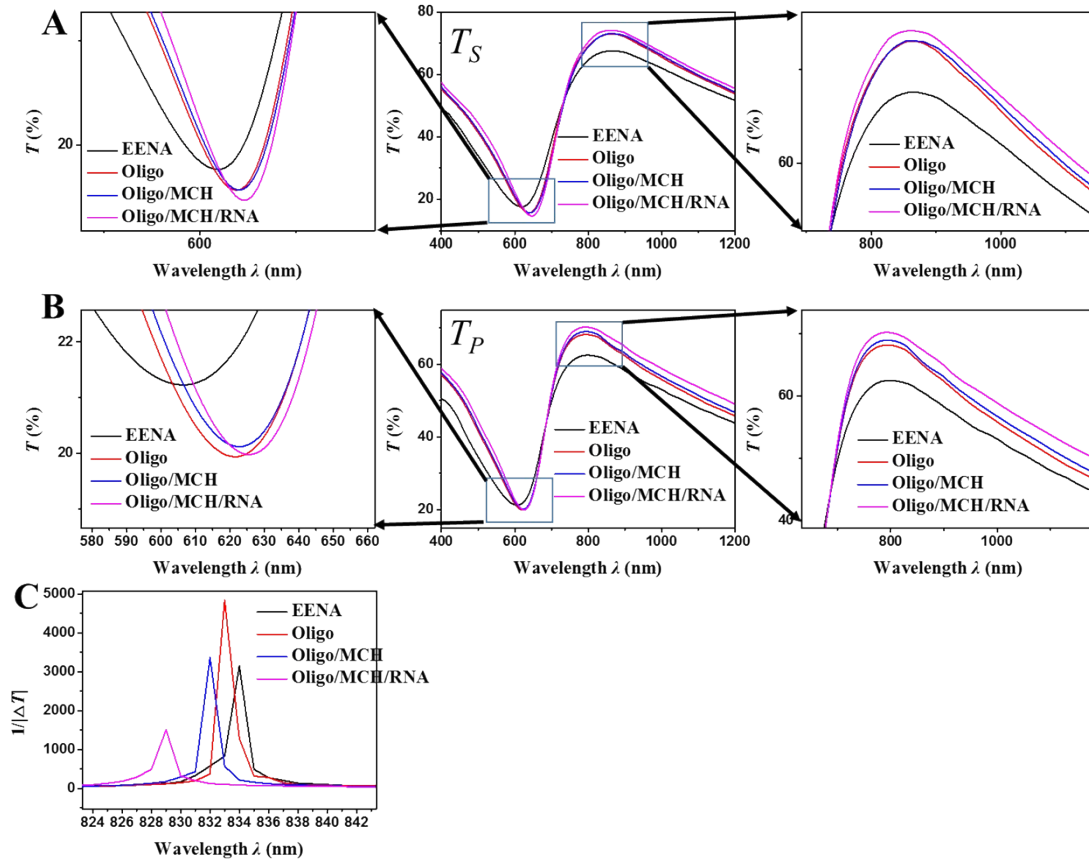

**Figure S22.** (A)  $T_S$  and (B)  $T_P$  of the pristine  $EE_{Ni}^{40^\circ}$  sample as well as the substrate with Oligo, Oligo/MCH, and Oligo/MCH/RNA. The left and right figures are the magnification of the dip and peak shift, respectively. (C) The spectra  $|\Delta T|^{-1}$  of  $\lambda_1$  of the pristine  $EE_{Ni}^{40^\circ}$  sample as well as the substrate with Oligo, Oligo/MCH, and Oligo/MCH/RNA.

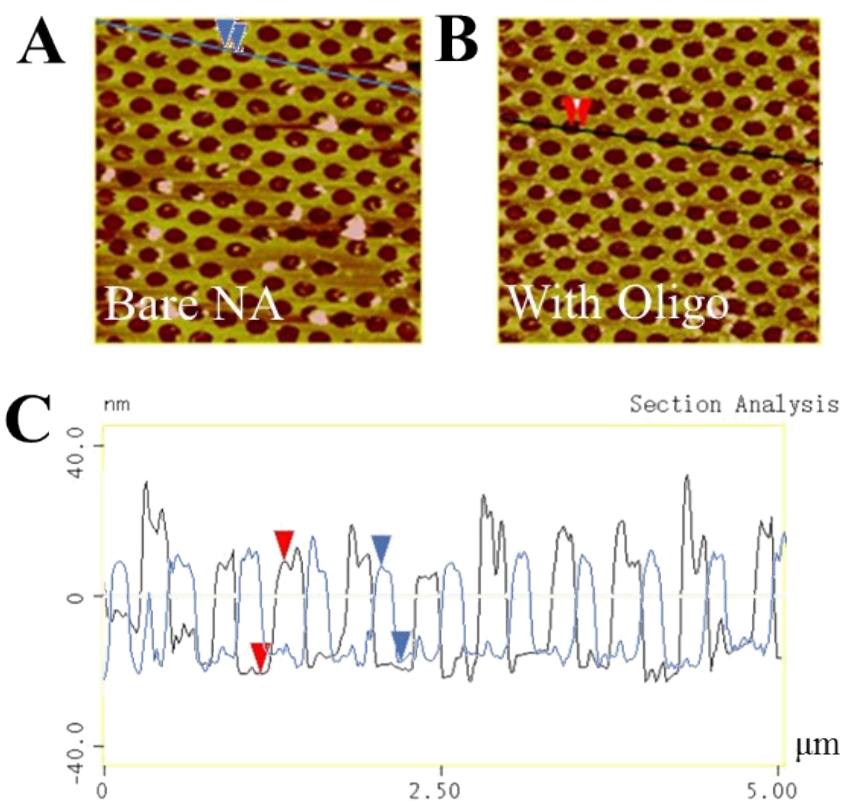

**Figure S23.** AFM images of the (A) bare  $E_{Ni}^{40^\circ}$  sample and (B) Oligo treated  $E_{Ni}^{40^\circ}$  sample. (C) Section analysis of the bare  $E_{Ni}^{40^\circ}$  sample (blue curve) and Oligo treated  $E_{Ni}^{40^\circ}$  sample (black curve). The section is along the blue and black line in (A) and (B), respectively. The thickness of the bare  $E_{Ni}^{40^\circ}$  sample and Oligo treated  $E_{Ni}^{40^\circ}$  sample is  $\sim 26$  nm and 30 nm, respectively.

## Section SXI. Effect of Thickness on Sensing Performances

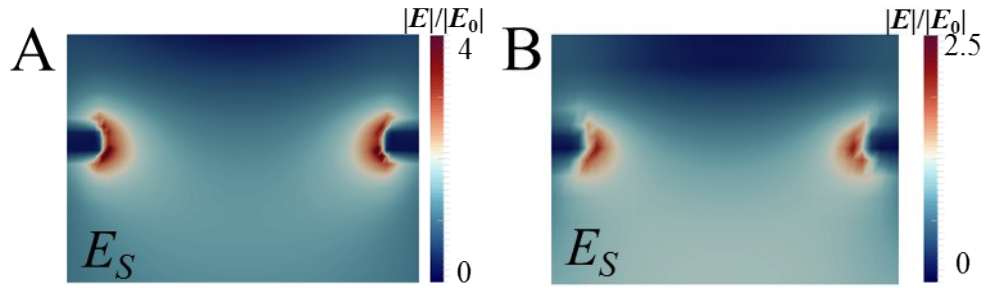

**Figure S24.** The calculated distribution of the  $E$ -fields  $|E|/|E_0|$  of the Sample  $EE_{Ni}^{40^\circ}$  for  $S$ -polarization ( $x$ - $z$  plane) with the grid size of (A) 4 nm and (B) 8 nm. They were calculated at the peak wavelength of  $\lambda_{max}^S = 944$  nm.

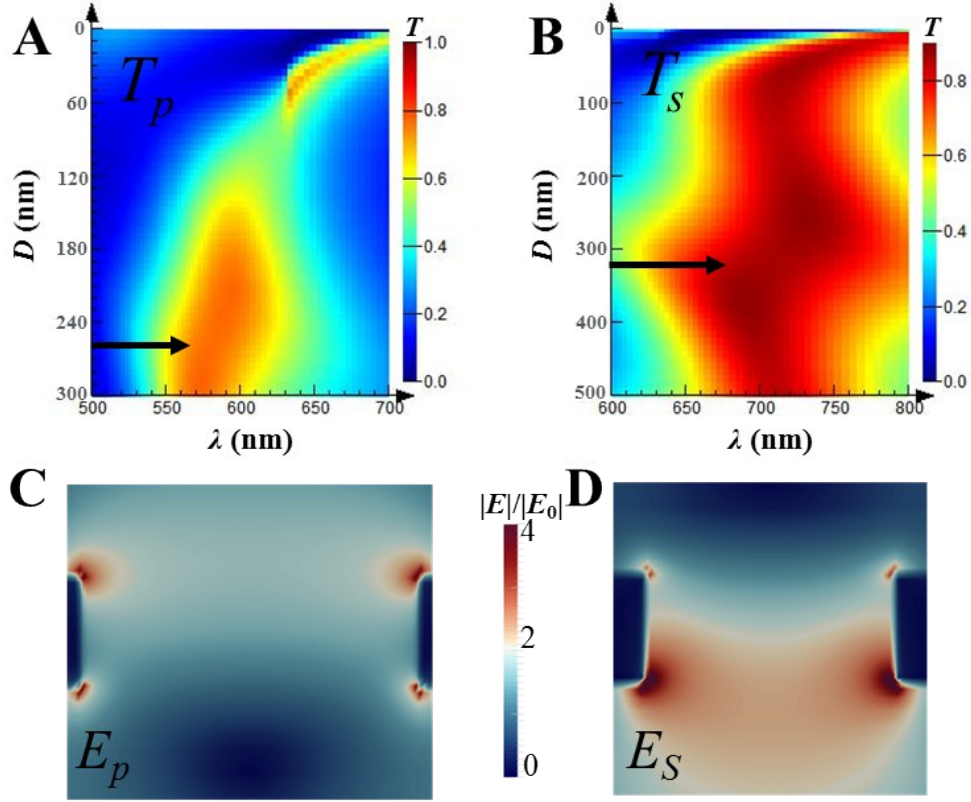

**Figure S25.** Color map of spectra (A)  $T_p$  and (B)  $T_s$  of the Ni based Sample  $EE^{40^\circ}$  with 100-nm Ag thickness as a function of  $D$ . The black arrows point to the inflection point ( $l_d$ ). The calculated distribution of the  $E$ -fields  $|E|/|E_0|$  of the Sample  $EE_{Ni}^{40^\circ}$  with 100-nm Ag thickness for (C)  $P$ - ( $y$ - $z$  plane) and (D)  $S$ -polarization ( $x$ - $z$  plane). They were calculated at the peak wavelength of  $\lambda_{max}^P = 594$  nm for (C) and  $\lambda_{max}^S = 722$  nm for (D).

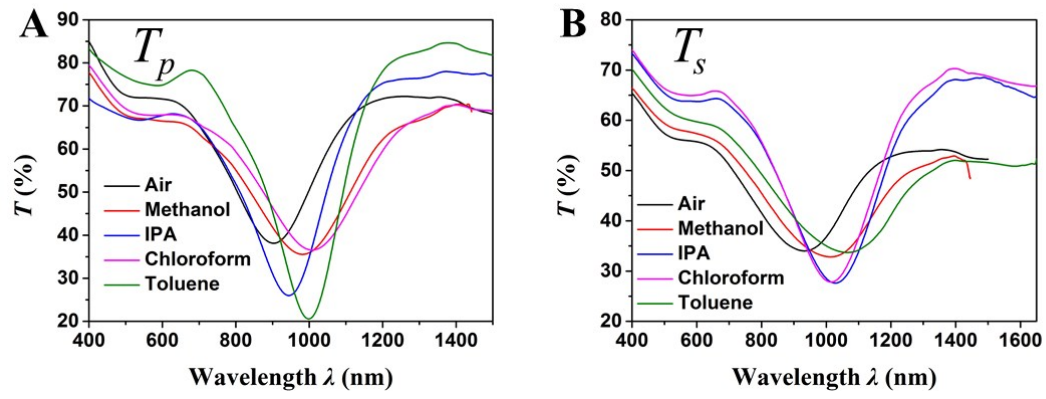

**Figure S26.** Spectra (A)  $T_p$  and (B)  $T_s$  of the Sample  $E^{30^\circ}$  in different surrounding environments. The Ag thickness is 12 nm. The peaks are too broad to be normalized.

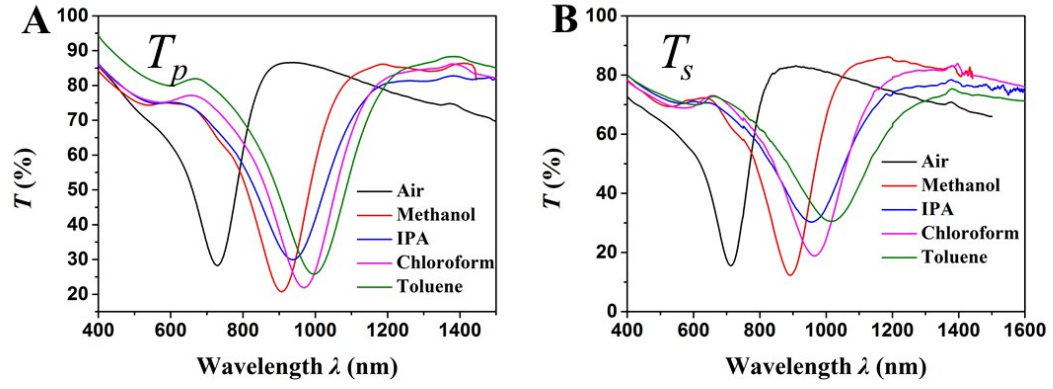

**Figure S27.** Spectra (A)  $T_p$  and (B)  $T_s$  of the Sample  $EE^{30^\circ}$  in different surrounding environments. The Ag thickness is 12 nm. The peaks are too broad to be normalized.

## Reference

1. G. K. Larsen, Y. He, W. Ingram, Y. Zhao, *Nano Lett.* **2013**, *13*, 6228.
